# Supplementary material for: Predicting Residual Angina After Chronic Total Occlusion Percutaneous Coronary Intervention: Insights from the OPEN‐CTO Registry
Source: PubMed Central journal article supplement — J Am Heart Assoc. 2022 May 16;11(10):e024056. doi: 10.1161/JAHA.121.024056 (PMC9238547; doi:10.1161/jaha.121.024056), 2022-05-16

## **SUPPLEMENTAL MATERIAL**

**Table S1. Characteristics of patients included and not included in the analyses**

| <b>Variable</b>                       | <b>Included<br/>n = 901</b> | <b>Excluded<br/>n = 99</b> | <b>P-Value</b> |
|---------------------------------------|-----------------------------|----------------------------|----------------|
| Age                                   | 65.7 ± 9.9                  | 62.6 ± 12.7                | 0.005          |
| Sex                                   |                             |                            | 0.337          |
| Male                                  | 728 (80.8%)                 | 76 (76.8%)                 |                |
| Female                                | 173 (19.2%)                 | 23 (23.2%)                 |                |
| Marital status                        |                             |                            | 0.002          |
| Married                               | 630 (70.2%)                 | 56 (57.7%)                 |                |
| Divorced/separated                    | 134 (14.9%)                 | 25 (25.8%)                 |                |
| Widowed                               | 81 (9.0%)                   | 5 (5.2%)                   |                |
| Single/other                          | 53 (5.9%)                   | 11 (11.3%)                 |                |
| Missing                               | 3                           | 2                          |                |
| Living alone                          | 179 (20.1%)                 | 23 (24.0%)                 | 0.378          |
| Missing                               | 12                          | 3                          |                |
| Completed high school                 | 807 (90.3%)                 | 81 (83.5%)                 | 0.038          |
| Missing                               | 7                           | 2                          |                |
| Finances at the end of the month      |                             |                            | < 0.001        |
| Some money left over                  | 537 (60.3%)                 | 39 (40.6%)                 |                |
| Just enough to make ends meet         | 247 (27.8%)                 | 37 (38.5%)                 |                |
| Not enough to make ends meet          | 106 (11.9%)                 | 20 (20.8%)                 |                |
| Missing                               | 11                          | 3                          |                |
| Working status                        |                             |                            | 0.765          |
| No                                    | 547 (61.0%)                 | 62 (63.9%)                 |                |
| Yes, full-time                        | 278 (31.0%)                 | 29 (29.9%)                 |                |
| Yes, part-time                        | 72 (8.0%)                   | 6 (6.2%)                   |                |
| Missing                               | 4                           | 2                          |                |
| Insurance coverage for medications    | 853 (95.0%)                 | 88 (90.7%)                 | 0.078          |
| Missing                               | 3                           | 2                          |                |
| Have avoided health care due to costs |                             |                            | 0.237          |
| Always                                | 25 (2.8%)                   | 4 (4.1%)                   |                |
| Frequently                            | 38 (4.3%)                   | 7 (7.1%)                   |                |
| Occasionally                          | 56 (6.3%)                   | 10 (10.2%)                 |                |
| Rarely                                | 80 (9.0%)                   | 7 (7.1%)                   |                |
| Never                                 | 694 (77.7%)                 | 70 (71.4%)                 |                |
| Missing                               | 8                           | 1                          |                |
| BMI                                   | 30.4 ± 5.9                  | 30.7 ± 6.8                 | 0.613          |

| <b>Variable</b>                              | <b>Included<br/>n = 901</b> | <b>Excluded<br/>n = 99</b> | <b>P-Value</b> |
|----------------------------------------------|-----------------------------|----------------------------|----------------|
| <b>BMI</b>                                   |                             |                            | <b>0.629</b>   |
| Underweight (<18.5)                          | 7 (0.8%)                    | 0 (0.0%)                   |                |
| Normal (18.5 to <25)                         | 131 (14.5%)                 | 18 (18.2%)                 |                |
| Overweight (25 to <30)                       | 340 (37.7%)                 | 31 (31.3%)                 |                |
| Class I Obesity (30 to <35)                  | 259 (28.7%)                 | 28 (28.3%)                 |                |
| Class II Obesity (35 to <40)                 | 106 (11.8%)                 | 15 (15.2%)                 |                |
| Class III Obesity (40+)                      | 58 (6.4%)                   | 7 (7.1%)                   |                |
| <b>Smoking history</b>                       |                             |                            | <b>0.026</b>   |
| Current Smoker                               | 111 (12.5%)                 | 22 (22.2%)                 |                |
| Former Smoker                                | 459 (51.6%)                 | 46 (46.5%)                 |                |
| Never Smoked                                 | 320 (36.0%)                 | 31 (31.3%)                 |                |
| Missing                                      | 11                          |                            |                |
| <b>Diabetes</b>                              | 362 (40.2%)                 | 50 (50.5%)                 | <b>0.047</b>   |
| <b>Hypertension</b>                          | 771 (85.6%)                 | 87 (87.9%)                 | <b>0.532</b>   |
| <b>Prior MI</b>                              | 423 (46.9%)                 | 61 (61.6%)                 | <b>0.005</b>   |
| <b>Prior PCI</b>                             | 594 (65.9%)                 | 63 (63.6%)                 | <b>0.648</b>   |
| <b>Prior CABG</b>                            | 338 (37.5%)                 | 27 (27.3%)                 | <b>0.044</b>   |
| <b>Prior stroke/TIA</b>                      | 82 (9.1%)                   | 9 (9.1%)                   | <b>0.997</b>   |
| <b>Congestive heart failure</b>              | 194 (21.5%)                 | 35 (35.4%)                 | <b>0.001</b>   |
| <b>Chronic kidney disease</b>                | 112 (12.4%)                 | 23 (23.2%)                 | <b>0.002</b>   |
| <b>Chronic lung disease</b>                  | 126 (14.0%)                 | 18 (18.2%)                 | <b>0.258</b>   |
| <b>Number of antianginal meds on arrival</b> |                             |                            | <b>0.059</b>   |
| 0                                            | 72 (8.0%)                   | 2 (2.0%)                   |                |
| 1                                            | 342 (38.0%)                 | 46 (46.5%)                 |                |
| 2                                            | 342 (38.0%)                 | 37 (37.4%)                 |                |
| 3                                            | 122 (13.5%)                 | 14 (14.1%)                 |                |
| 4                                            | 23 (2.6%)                   | 0 (0.0%)                   |                |
| <b>Ischemia on stress test</b>               | 438 (89.2%)                 | 47 (94.0%)                 | <b>0.289</b>   |
| Missing                                      | 410                         | 49                         |                |
| <b>LV ejection fraction</b>                  | 51.4 ± 13.3                 | 47.6 ± 17.0                | <b>0.012</b>   |
| Missing                                      | 81                          | 6                          |                |
| <b>LV ejection fraction</b>                  |                             |                            | <b>0.004</b>   |
| Hyperdynamic: >70%                           | 33 (4.0%)                   | 6 (6.5%)                   |                |
| Normal: 50-70%                               | 505 (61.6%)                 | 47 (50.5%)                 |                |
| Mildly Reduced: 40-49%                       | 138 (16.8%)                 | 10 (10.8%)                 |                |
| Moderately Reduced: 30-39%                   | 78 (9.5%)                   | 13 (14.0%)                 |                |
| Severely reduced: ≤29%                       | 66 (8.0%)                   | 17 (18.3%)                 |                |
| Missing                                      | 81                          | 6                          |                |

| <b>Variable</b>                 | <b>Included<br/>n = 901</b> | <b>Excluded<br/>n = 99</b> | <b>P-Value</b> |
|---------------------------------|-----------------------------|----------------------------|----------------|
| Indication for CTO intervention |                             |                            | 0.036          |
| Symptom relief                  | 659 (73.1%)                 | 59 (59.6%)                 |                |
| Ischemia reduction              | 97 (10.8%)                  | 13 (13.1%)                 |                |
| Staged procedure                | 48 (5.3%)                   | 8 (8.1%)                   |                |
| Reduced EF                      | 42 (4.7%)                   | 10 (10.1%)                 |                |
| Other                           | 55 (6.1%)                   | 9 (9.1%)                   |                |
| Primary CTO vessel              |                             |                            | 0.526          |
| LAD                             | 182 (20.2%)                 | 26 (26.3%)                 |                |
| LCX                             | 153 (17.0%)                 | 16 (16.2%)                 |                |
| LM                              | 8 (0.9%)                    | 0 (0.0%)                   |                |
| RCA                             | 558 (61.9%)                 | 57 (57.6%)                 |                |
| Multiple CTO lesions            | 48 (5.3%)                   | 4 (4.0%)                   | 0.584          |
| Any non-CTO lesions             | 117 (13.0%)                 | 20 (20.2%)                 | 0.047          |
| <i>JCTO Score Components</i>    |                             |                            |                |
| Blunt Cap                       | 574 (63.7%)                 | 62 (62.6%)                 | 0.831          |
| Length > 20mm                   | 553 (61.4%)                 | 63 (63.6%)                 | 0.660          |
| Bending                         | 494 (54.8%)                 | 49 (49.5%)                 | 0.311          |
| Calcification                   | 297 (33.0%)                 | 28 (28.3%)                 | 0.345          |
| Retry                           | 182 (20.2%)                 | 22 (22.2%)                 | 0.635          |
| PHQ-8 Score (BL)                | 6.2 ± 5.5                   | 7.9 ± 6.6                  | 0.006          |
| Missing                         | 21                          | 4                          |                |
| PHQ-8 Positive Screen (BL)      | 210 (23.9%)                 | 36 (37.9%)                 | 0.002          |
| Missing                         | 21                          | 4                          |                |
| SAQ Physical Limitation (BL)    | 65.8 ± 26.1                 | 56.5 ± 25.9                | 0.001          |
| Missing                         | 57                          | 12                         |                |
| SAQ Angina Frequency (BL)       | 70.3 ± 27.0                 | 72.2 ± 27.7                | 0.496          |
| Missing                         | 0                           | 1                          |                |
| SAQ Angina Frequency (BL)       |                             |                            | 0.641          |
| Daily (0-30)                    | 104 (11.5%)                 | 12 (12.2%)                 |                |
| Weekly (40-60)                  | 266 (29.5%)                 | 24 (24.5%)                 |                |
| Monthly (70-90)                 | 275 (30.5%)                 | 29 (29.6%)                 |                |
| None (100)                      | 256 (28.4%)                 | 33 (33.7%)                 |                |
| Missing                         |                             | 1                          |                |

| <b>Variable</b>                 | <b>Included<br/>n = 901</b> | <b>Excluded<br/>n = 99</b> | <b>P-Value</b> |
|---------------------------------|-----------------------------|----------------------------|----------------|
| SAQ Q3: Angina frequency        |                             |                            | 0.493          |
| 4 or more times per day         | 93 (10.4%)                  | 13 (13.3%)                 |                |
| 1-3 times per day               | 174 (19.4%)                 | 14 (14.3%)                 |                |
| 3 or more times per week        | 157 (17.5%)                 | 12 (12.2%)                 |                |
| 1-2 times per week              | 109 (12.1%)                 | 14 (14.3%)                 |                |
| Less than once a week           | 98 (10.9%)                  | 11 (11.2%)                 |                |
| None over the past 4 weeks      | 267 (29.7%)                 | 34 (34.7%)                 |                |
| Missing                         | 3                           | 1                          |                |
| SAQ Q4: Nitroglycerin frequency |                             |                            | 0.828          |
| 4 or more times per day         | 18 (2.0%)                   | 3 (3.1%)                   |                |
| 1-3 times per day               | 64 (7.1%)                   | 8 (8.2%)                   |                |
| 3 or more times per week        | 48 (5.4%)                   | 3 (3.1%)                   |                |
| 1-2 times per week              | 55 (6.1%)                   | 5 (5.1%)                   |                |
| Less than once a week           | 111 (12.4%)                 | 10 (10.2%)                 |                |
| None over the past 4 weeks      | 600 (67.0%)                 | 69 (70.4%)                 |                |
| Missing                         | 5                           | 1                          |                |
| SAQ Angina Frequency (BL)       |                             |                            | 0.641          |
| Daily (0-30)                    | 104 (11.5%)                 | 12 (12.2%)                 |                |
| Weekly (40-60)                  | 266 (29.5%)                 | 24 (24.5%)                 |                |
| Monthly (70-90)                 | 275 (30.5%)                 | 29 (29.6%)                 |                |
| None (100)                      | 256 (28.4%)                 | 33 (33.7%)                 |                |
| Missing                         |                             | 1                          |                |
| SAQ Quality of Life (BL)        | 49.7 ± 27.1                 | 43.0 ± 27.8                | 0.020          |
| Missing                         | 3                           | 1                          |                |
| SAQ Summary Score (BL)          | 61.9 ± 22.5                 | 57.9 ± 22.0                | 0.094          |
| Missing                         | 0                           | 1                          |                |
| Rose Dyspnea Scale (BL)         | 2.2 ± 1.5                   | 2.7 ± 1.5                  | 0.001          |
| Missing                         | 12                          | 1                          |                |

*BMI – body mass index; MI – myocardial infarction; PCI – percutaneous coronary intervention; CABG – coronary artery bypass graft; TIA – transient ischemic attack; LV – left ventricle; CTO – chronic total occlusion; EF – ejection fraction; PHQ – patient health questionnaire; BL - baseline*

**Table S2. Percentage of patients with a  $\geq 20$  point change in SAQ angina frequency score by patient characteristics in final model and baseline angina**

| Variable                              | Value                                  | All patients<br>N=901 | Daily (0-30)<br>N=104 | Weekly (40-60)<br>N=266 | Monthly (70-90)<br>N=275 | None (100)<br>N=256 |
|---------------------------------------|----------------------------------------|-----------------------|-----------------------|-------------------------|--------------------------|---------------------|
| All Patients                          | –                                      | 477/901 (52.9%)       | 95/104 (91.3%)        | 214/266 (80.5%)         | 168/275 (61.1%)          | 0/256 (0.0%)        |
| Number of antianginal meds on arrival | 0                                      | 24/72 (33.3%)         | 2/2 (100.0%)          | 10/11 (90.9%)           | 12/21 (57.1%)            | 0/38 (0.0%)         |
|                                       | 1                                      | 151/342 (44.2%)       | 17/19 (89.5%)         | 65/77 (84.4%)           | 69/122 (56.6%)           | 0/124 (0.0%)        |
|                                       | 2                                      | 206/342 (60.2%)       | 49/51 (96.1%)         | 97/113 (85.8%)          | 60/91 (65.9%)            | 0/87 (0.0%)         |
|                                       | 3                                      | 81/122 (66.4%)        | 22/23 (95.7%)         | 35/55 (63.6%)           | 24/38 (63.2%)            | 0/6 (0.0%)          |
|                                       | 4                                      | 15/23 (65.2%)         | 5/9 (55.6%)           | 7/10 (70.0%)            | 3/3 (100.0%)             | 0/1 (0.0%)          |
| Indication for CTO intervention       | Symptom relief/ischemia reduction      | 481/756 (55.3%)       | 88/97 (90.7%)         | 195/247 (78.9%)         | 135/221 (61.1%)          | 0/191 (0%)          |
|                                       | Staged procedure/reduced EF/Other      | 59/145 (40.7%)        | 7/7 (100%)            | 19/19 (100%)            | 33/54 (61.1%)            | 0/65 (0%)           |
| Multiple CTO lesions                  | No                                     | 453/853 (53.1%)       | 88/95 (92.6%)         | 204/250 (81.6%)         | 161/261 (61.7%)          | 0/247 (0.0%)        |
|                                       | Yes                                    | 24/48 (50.0%)         | 7/9 (77.8%)           | 10/16 (62.5%)           | 7/14 (50.0%)             | 0/9 (0.0%)          |
| PHQ-8 Positive Screen (BL)            | No                                     | 343/670 (51.2%)       | 56/62 (90.3%)         | 158/184 (85.9%)         | 129/206 (62.6%)          | 0/218 (0.0%)        |
|                                       | Yes                                    | 125/210 (59.5%)       | 39/41 (95.1%)         | 51/75 (68.0%)           | 35/64 (54.7%)            | 0/30 (0.0%)         |
| SAQ Q3: Angina frequency              | 4 or more times per day                | 82/93 (88.2%)         | 35/39 (89.7%)         | 47/54 (87.0%)           |                          |                     |
|                                       | 1-3 times per day                      | 147/174 (84.5%)       | 52/57 (91.2%)         | 95/117 (81.2%)          |                          |                     |
|                                       | 3 or more times/week but not every day | 121/157 (77.1%)       | 8/8 (100.0%)          | 53/72 (73.6%)           | 60/77 (77.9%)            |                     |

| <b>Variable</b>                 | <b>Value</b>                           | <b>All patients<br/>N=901</b> | <b>Daily (0-30)<br/>N=104</b> | <b>Weekly (40-60)<br/>N=266</b> | <b>Monthly (70-90)<br/>N=275</b> | <b>None (100)<br/>N=256</b> |
|---------------------------------|----------------------------------------|-------------------------------|-------------------------------|---------------------------------|----------------------------------|-----------------------------|
|                                 | 1-2 times per week                     | 95/109 (87.2%)                |                               | 16/20 (80.0%)                   | 79/89 (88.8%)                    |                             |
|                                 | Less than once a week                  | 29/98 (29.6%)                 |                               | 2/2 (100.0%)                    | 27/96 (28.1%)                    |                             |
|                                 | None over the past 4 weeks             | 2/267 (0.7%)                  |                               |                                 | 2/13 (15.4%)                     | 0/254 (0.0%)                |
| SAQ Q4: Nitroglycerin frequency | 4 or more times per day                | 18/18 (100.0%)                | 17/17 (100.0%)                | 1/1 (100.0%)                    |                                  |                             |
|                                 | 1-3 times per day                      | 58/64 (90.6%)                 | 54/59 (91.5%)                 | 4/5 (80.0%)                     |                                  |                             |
|                                 | 3 or more times/week but not every day | 37/48 (77.1%)                 | 18/20 (90.0%)                 | 18/27 (66.7%)                   | 1/1 (100.0%)                     |                             |
|                                 | 1-2 times per week                     | 42/55 (76.4%)                 | 4/5 (80.0%)                   | 35/46 (76.1%)                   | 3/4 (75.0%)                      |                             |
|                                 | Less than once a week                  | 86/111 (77.5%)                |                               | 43/54 (79.6%)                   | 43/57 (75.4%)                    |                             |
|                                 | None over the past 4 weeks             | 233/600 (38.8%)               |                               | 112/132 (84.8%)                 | 121/213 (56.8%)                  | 0/255 (0.0%)                |
| Rose Dyspnea Scale >=2          | No                                     | 127/329 (38.6%)               | 15/15 (100%)                  | 60/67 (89.6%)                   | 52/97 (53.6%)                    | 0/150 (0%)                  |
|                                 | Yes                                    | 346/560 (61.8%)               | 76/84 (90.5%)                 | 154/197 (78.2%)                 | 116/176 (65.9%)                  | 0/103 (0%)                  |

**Figure S1. Observed 6-month angina frequency by risk score stratified by baseline angina frequency**

A. 6-month angina frequency by risk score among those with daily angina at baseline

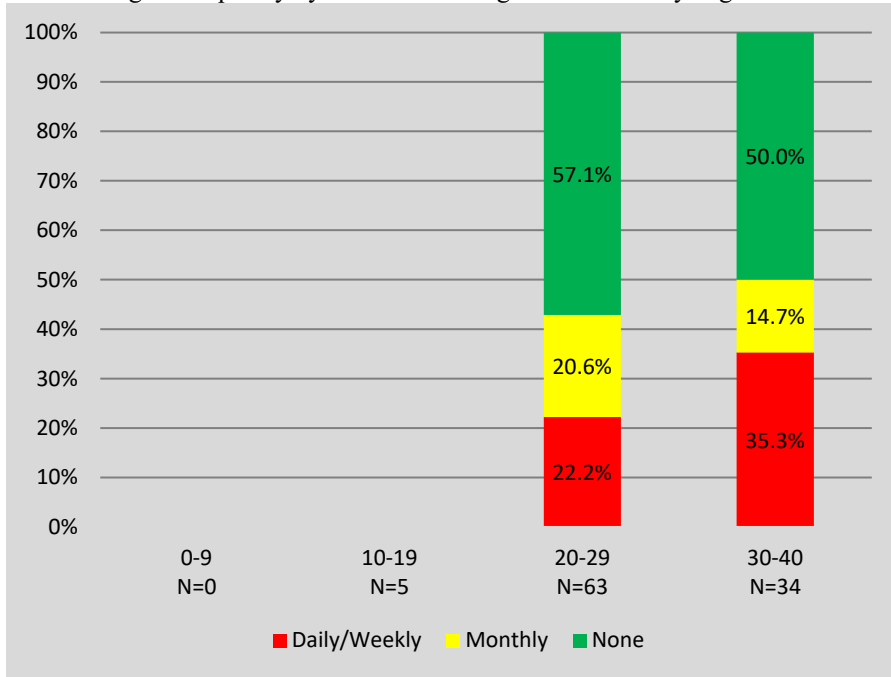

B. 6-month angina frequency by risk score among those with weekly angina at baseline

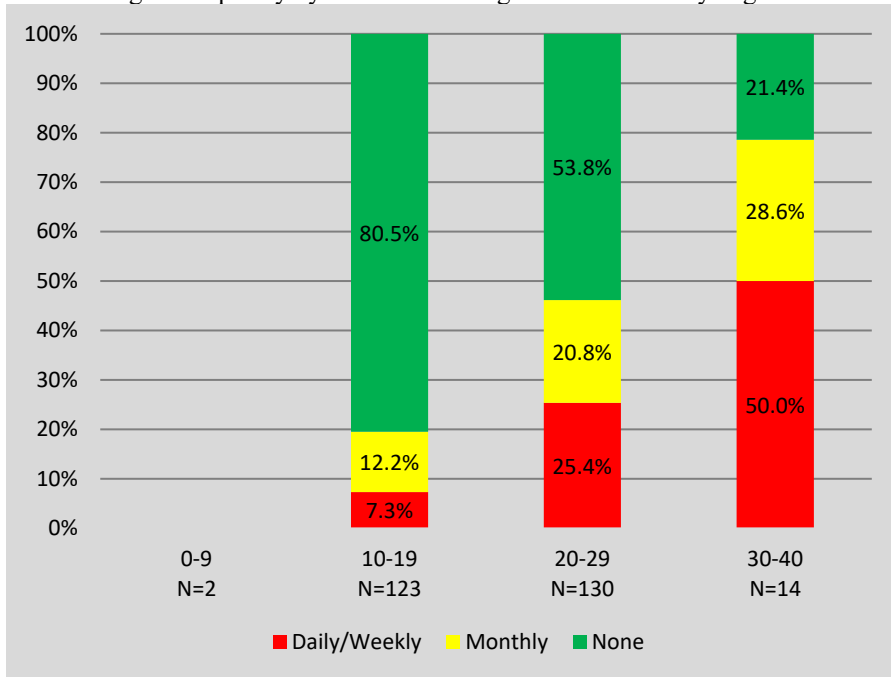



C. 6-month angina frequency by risk score among those with monthly angina at baseline

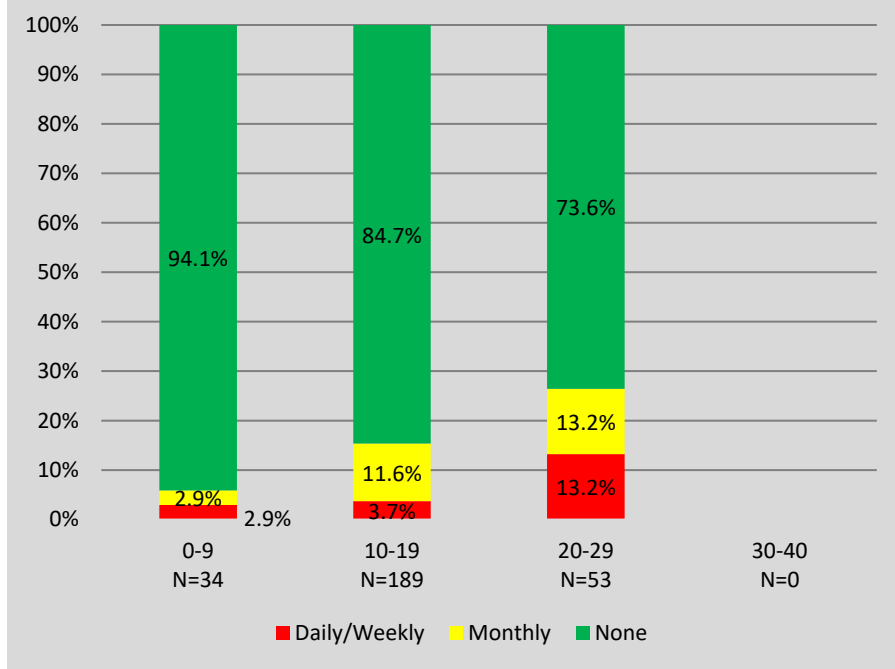

D. 6-month angina frequency by risk score among those with no angina at baseline

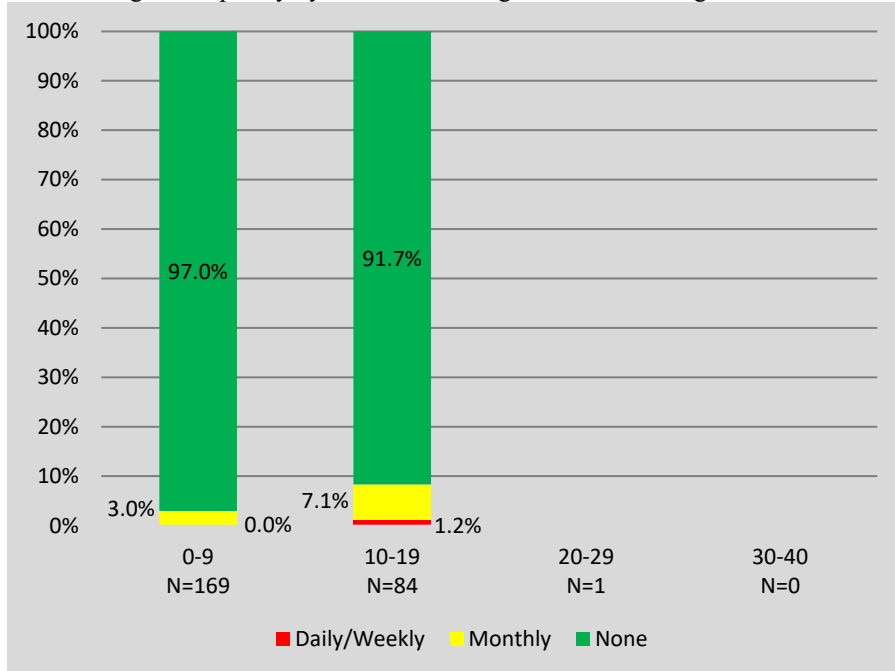

Figure S2. Observed 6-month angina frequency by risk score among patients with procedural success

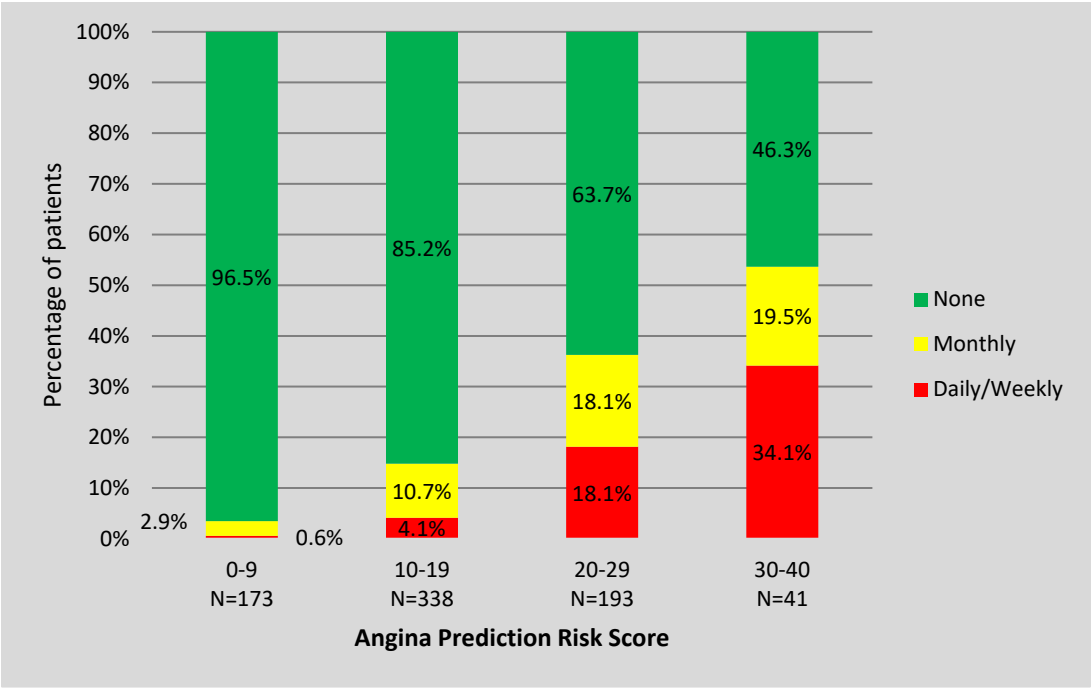

Figure S3. Receiver operating curve of CTO angina prediction model for outcome of  $\geq 20$ -point increase in SAQ Angina Frequency Score

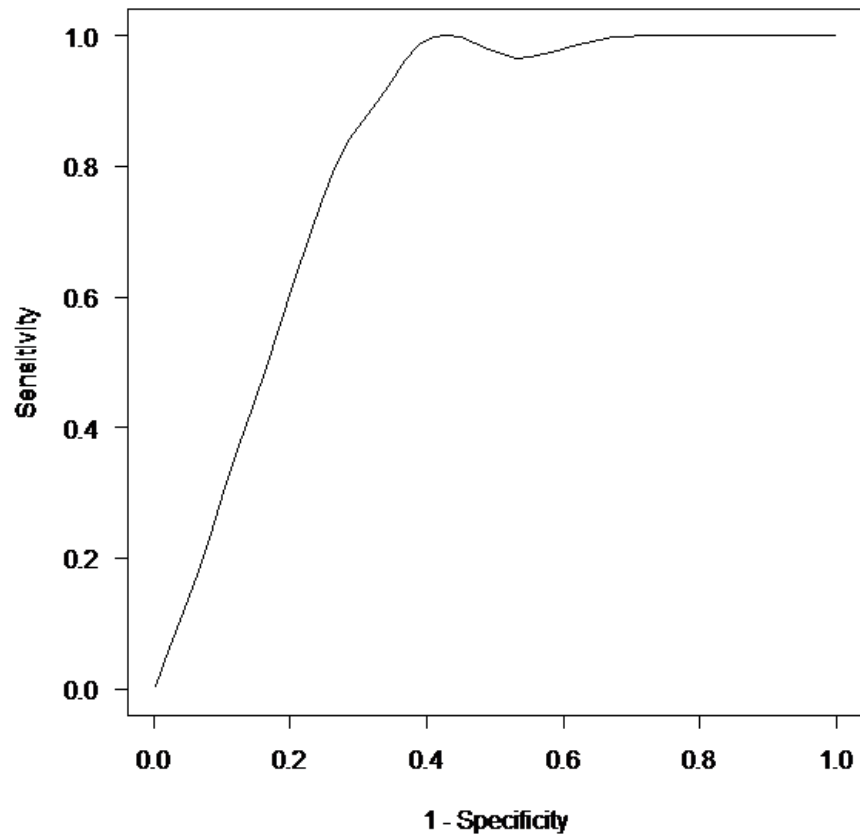

Supplement: JAH3-11-e024056-s001.pdf [file JAH3-11-e024056-s001.pdf]
